# Supplementary material for: Strain-engineered thermophysical properties ranging from band-insulating to topological insulating phases in β-antimonene
Source: Royal Society of Chemistry journal article supplement (doi:10.1039/d3nr02255b), 2023-01-01
Supplement: d3nr02255b1.pdf [file d3nr02255b1.pdf]

## Supplementary Information

### Strain-engineered thermophysical properties ranging from band insulating to topological insulating phases in $\beta$ -Antimonene

Sumit Kukreti<sup>a</sup>, Surbhi Ramawat<sup>a</sup>, Nirpendra Singh<sup>b</sup>, Ambesh Dixit<sup>a\*</sup>

<sup>a</sup>Advanced Materials and Device (A-MAD) Laboratory, Department of Physics, Indian Institute of Technology Jodhpur, 342030, India

<sup>b</sup>Department of Physics, Khalifa University of Science and Technology, Abu Dhabi-127788, United Arab Emirates (UAE)

\*[ambesh@iitj.ac.in](mailto:ambesh@iitj.ac.in)

#### 1. Crystal Orbital Hamiltonian Population (COHP)

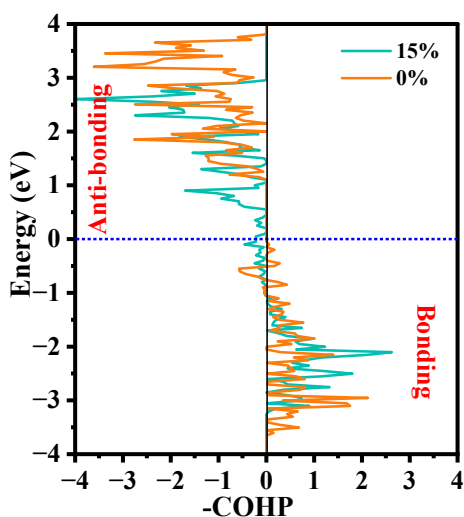

**Fig. S1:** The Crystal Orbital Hamiltonian Population comparing (-COHP) for 0% to 15 % strain. Near fermi level the relatively larger population of the antibonding states at 15% strain indicate the weakening in covalent bond leading a anharmonicity.

## 2. Mechanical & Structural Properties:

**Table S1:** Elastic stiffness Coefficients, bulk modulus (B), density ( $\rho$ ), the sound velocity in transverse ( $v_t$ ) and longitudinal direction ( $v_l$ ) for the pristine and strained  $\beta$ -Sb system.

| Strain | $C_{11}$<br>(N m <sup>-1</sup> ) | $C_{12}$<br>(N m <sup>-1</sup> ) | $C_{66}$<br>(N m <sup>-1</sup> ) | B<br>(N m <sup>-1</sup> ) | $\rho$<br>(kg m <sup>-2</sup> ) | Poisson<br>ratio | $v_t$<br>(km s <sup>-1</sup> ) | $v_l$<br>(km s <sup>-1</sup> ) |
|--------|----------------------------------|----------------------------------|----------------------------------|---------------------------|---------------------------------|------------------|--------------------------------|--------------------------------|
| 0%     | 32.746                           | 6.395                            | 13.176                           | 19.571                    | $2.75 \times 10^{-6}$           | 0.195            | 2.18                           | 3.45                           |
| 5%     | 23.761                           | 5.619                            | 9.071                            | 14.690                    | $2.54 \times 10^{-6}$           | 0.236            | 1.90                           | 3.09                           |
| 10%    | 17.018                           | 4.234                            | 6.392                            | 10.626                    | $2.27 \times 10^{-6}$           | 0.248            | 1.68                           | 2.74                           |
| 15%    | 6.259                            | 1.099                            | 2.580                            | 3.679                     | $2.08 \times 10^{-6}$           | 0.176            | 1.13                           | 1.73                           |

The average sound velocity in the crystal is given by;

$$v_s = \left[ \frac{1}{3} \left( \frac{1}{v_l^3} + \frac{2}{v_t^3} \right) \right]^{-\frac{1}{3}} \#(1)$$

Where  $v_l$  and  $v_s$  are the longitudinal and transverse sound velocity and given as follows;

$$v_l = \left( \frac{B + G}{\rho_{2D}} \right)^{\frac{1}{2}} \#(2)$$

$$\text{② } v_t = \left( \frac{G}{\rho_{2D}} \right)^{\frac{1}{2}} \#(3)$$

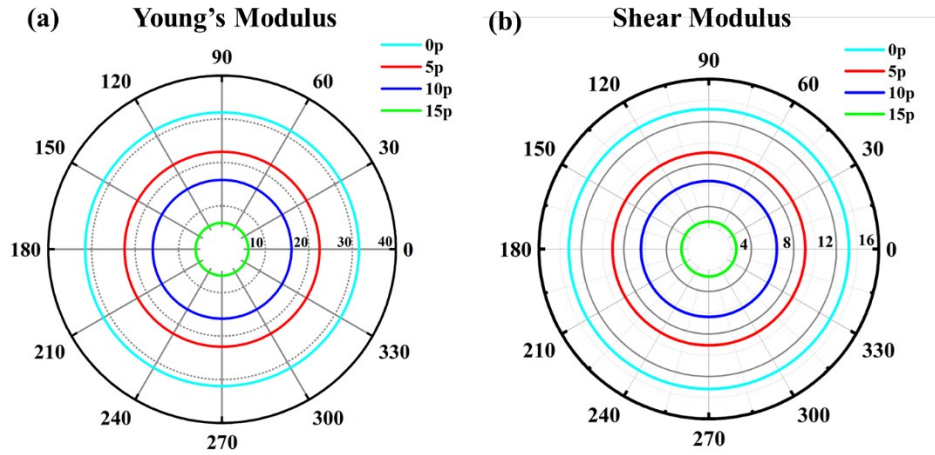

**Fig. S2:** The isotropic Young's Modulus ( $Y$ ) and Shear Modulus ( $G$ ) for the range of strain 0% to 15%. A reduction in its value indicates the reduction in bond strength with increasing biaxial strain.

### 3. Biaxial strain effect on Bandgap:

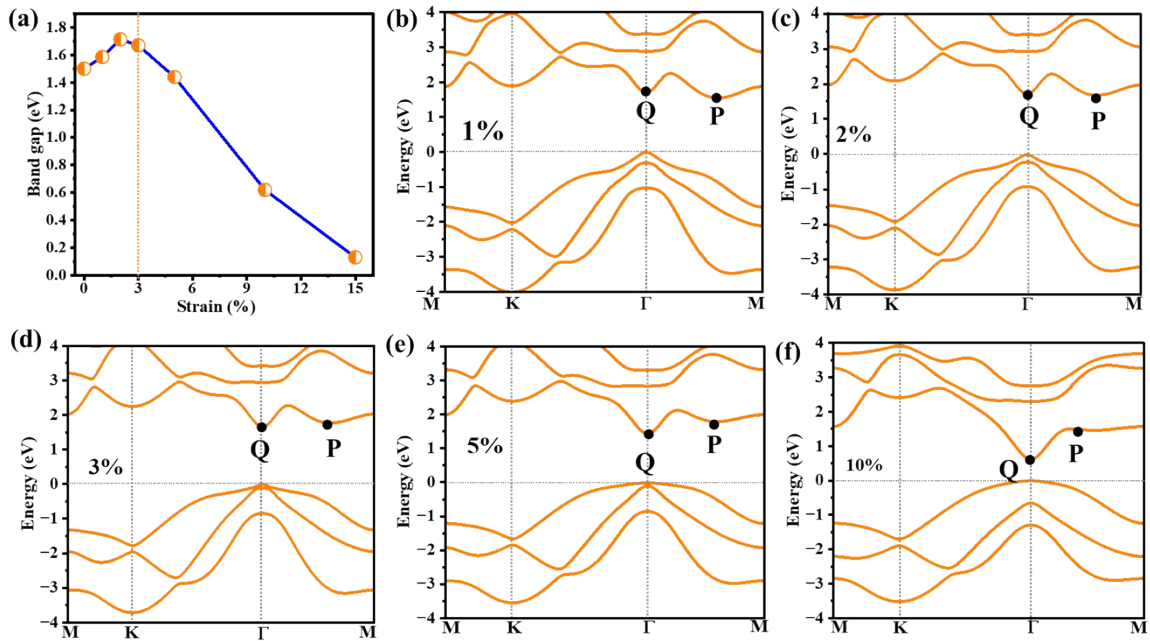

**Fig. S3:** Biaxial strain effect on the bandgap value (HSE06) for the range of strain 0% to 15% in  $\beta$ -Sb monolayer. The dotted vertical line shows indirect to direct bandgap transition at  $\sim$  3% strain (b-f) Calculated HSE06, the electronic band structure of  $\beta$ -Sb including SOC for different strain (b) 1% strain (c) 2% strain (d) 3% strain (e) 5% strain (f) 10% strain.

### 4. Z2 Invariant in topological insulator:

In two-dimensions, to distinguish the quantum spin Hall phase from the band insulator, the  $Z_2$  invariant is defined. Following Fu et al. approach,  $Z_2$  invariant can also be determined in the presence of inversion symmetry, through parity of the occupied band eigenstates at the four time-reversal invariant momenta (TRIM)  $\Gamma_i$  points. This can be given by the quantities.

$$\delta_i = \prod_{m=1}^N \xi_{2m}(\Gamma_i) \#(4)$$

Where,  $\xi_{2m}(\Gamma_i) = \pm 1$  is the parity eigenvalue of the  $2m^{\text{th}}$  occupied energy band at  $\Gamma_i$ . The  $Z_2$  invariant  $\nu = 0, 1$  which determine the quantum spin-Hall phase, and is given as the product of  $\delta_i$ 's.

$$(-1)^\nu = \prod_i \delta_i \#(5)$$

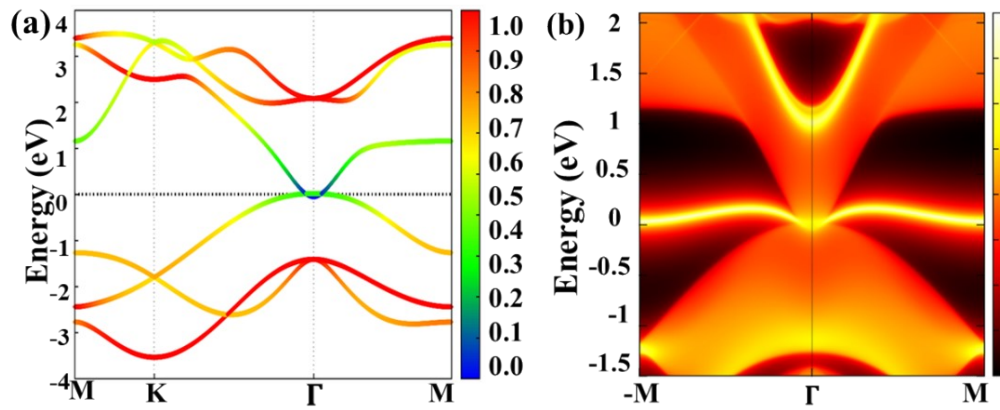

**Fig. S4:** (a) HSE06 based (without considering spin-orbit coupling) orbital projected band structure of  $\beta$ -Sb monolayer at 15% strain when no spin-orbit coupling is considered. The red colour denotes the complete p-orbital contribution. The dotted line indicates the fermi level. (b) Surface DOS for the 15% case within -1.5 eV to 2 eV energy range. The bright yellow region near fermi level signifies the two branches of overlapped edge states.

## 5. Weighted Phase space of phonon-phonon scattering:

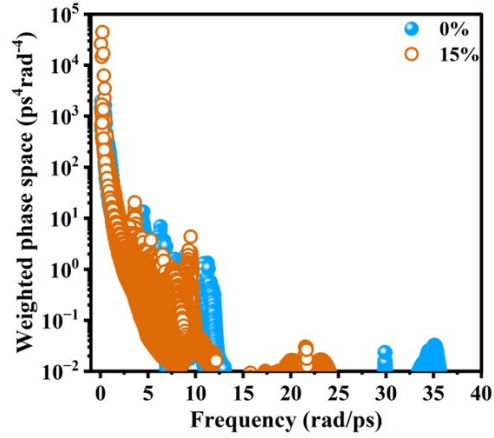

**Fig. S5:** Weighted phase space vs frequency (rad/ps) curve for 0% and 15% tensile strain.

## 6. Mild Strain Raman Spectra

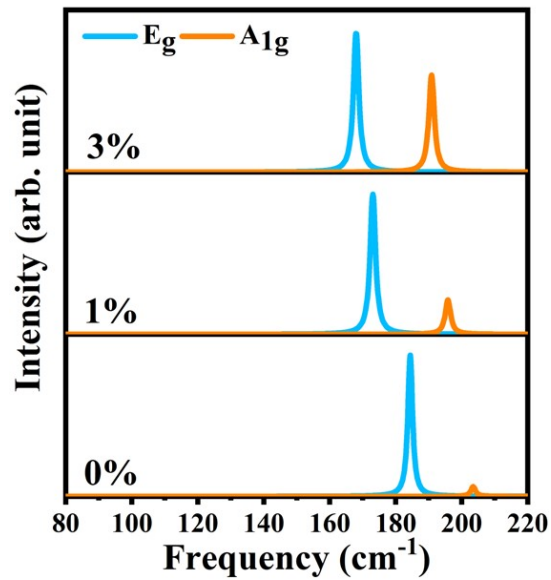

**Fig. S6:** Calculated Raman spectra as a function of frequency (cm<sup>-1</sup>), under mild tensile strain ranging 0%, 1% and 3%. Orange and blue peaks represent the A<sub>1g</sub> and E<sub>g</sub> modes, respectively.
